# Supplementary material
Source: publisher figshare collection journal article supplement (https://acs.figshare.com/ndownloader/files/9599356)
Supplement: Supplementary file 1 [file 9599356]

## SUPPORTING INFORMATION

### **Predictive structure-based toxicology approaches to assess the androgenic potential of chemicals**

Daniela Trisciuzzi<sup>a</sup>, Domenico Alberga<sup>a,b</sup>, Kamel Mansouri<sup>c,d,e</sup>, Richard Judson<sup>d</sup>, Ettore Novellino<sup>f</sup>, Giuseppe Felice Mangiatordi<sup>a,b\*</sup> and Orazio Nicolotti<sup>a,b\*</sup>

- a. Dipartimento di Farmacia-Scienze del Farmaco, Università degli Studi di Bari “Aldo Moro,” Via E. Orabona 4, I-70126 Bari, Italy*
- b. Centro Ricerche TIRES, Università degli Studi di Bari “Aldo Moro”, Via Amendola 173, I-70126 Bari, Italy*
- c. Oak Ridge Institute for Science and Education, Oak Ridge, TN, USA*
- d. National Center for Computational Toxicology, U.S. Environmental Protection Agency, 109 T.W. Alexander Drive, Research Triangle Park, NC 27711, USA*
- e. ScitoVation LLC, 6 Davis Dr, Research Triangle Park, NC 27709*
- f. Dipartimento di Farmacia – Università degli Studi di Napoli “Federico II”, Via D. Montesano 49, 80131 Napoli, Italy*

\* Authors to whom correspondence should be addressed; e-mails: [giuseppe.mangiatordi@uniba.it](mailto:giuseppe.mangiatordi@uniba.it) and [orazio.nicolotti@uniba.it](mailto:orazio.nicolotti@uniba.it); telephone: +39-080-544-2551/2765; fax: +39-080-5442230

## Tables

**Table S1.** Chemical structures of X-ray solved cognate ligands of PDB entries 2AM9, 2AX9, 2PNU, 3B66, 3L3X, 3RLJ, 5CJ6, 4QL8 and 2HVC. Hydrogen bonds, hydrophobic,  $\pi$ - $\pi$  and  $\pi$ -cation interactions of each cognate ligands in the corresponding binding site residues are also reported.

| PDB CODE | X-ray solved cognate ligand                                                         | Hydrogen bond              | Hydrophobic interactions             | $\pi$ - $\pi$<br>$\pi$ -cation interactions. |
|----------|-------------------------------------------------------------------------------------|----------------------------|--------------------------------------|----------------------------------------------|
| 2AM9     | 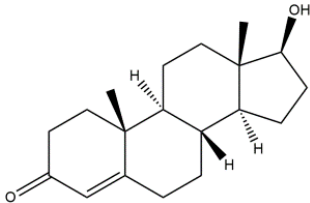   | Asn705<br>Thr877           | Leu873<br>Met895                     | -                                            |
| 2AX9     |   | Leu704<br>Asn705<br>Gln711 | Met745                               | -                                            |
| 2PNU     |  | Asn705<br>Thr877           | Trp741<br>Met742<br>Met745<br>Leu873 | Trp741                                       |
| 3B66     |  | Asn705                     | Trp741<br>Met745<br>Thr877<br>Met895 | Trp741                                       |

|      |                                                                                     |                  |                                      |        |
|------|-------------------------------------------------------------------------------------|------------------|--------------------------------------|--------|
| 3L3X | 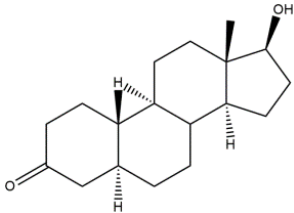   | Asn705<br>Thr877 | Met745<br>Met780<br>Met895<br>Leu873 | -      |
| 3RLJ |    | Leu704<br>Asn705 | Met742<br>Met745<br>Thr877<br>Met895 | Trp741 |
| 5CJ6 |   | Asn705           | Leu704<br>Met745<br>Thr877           | -      |
| 4QL8 |  | Asn705<br>Thr877 | Gly708                               | -      |
| 2HVC |  | Gln711<br>Arg752 | Leu704                               | -      |

**Table S2.** RMSD values (Å) computed comparing the Cartesian coordinates of the heavy atoms of the docking poses with those available in the X-ray cognate ligands.

| <b>PDB<br/>CODE</b> | <b>RMSD</b> |
|---------------------|-------------|
| <b>2AM9</b>         | 0.495       |
| <b>2AX9</b>         | 0.436       |
| <b>2PNU</b>         | 0.890       |
| <b>3B66</b>         | 0.574       |
| <b>3L3X</b>         | 0.654       |
| <b>3RLJ</b>         | 2.069       |
| <b>5CJ6</b>         | 1.906       |
| <b>4QL8</b>         | 0.544       |
| <b>2HVC</b>         | 0.441       |

**Table S3.** Maximum and minimum values of the 162 molecular descriptors.

| <b>Molecular Descriptor</b>                 | <b>Minimum</b> | <b>Maximum</b> |
|---------------------------------------------|----------------|----------------|
| MW                                          | 42.04          | 1701.19        |
| AlogP                                       | -13.97         | 18.10          |
| HBA                                         | 0              | 46             |
| HBD                                         | 0              | 25             |
| RB                                          | 0              | 32             |
| HeavyAtomCount                              | 3              | 122            |
| ChiralCenterCount                           | 0              | 40             |
| ChiralCenterCountAllPossible                | 0              | 40             |
| RingCount                                   | 0              | 11             |
| PSA                                         | 0              | 777.98         |
| Estate                                      | 6.5            | 390.01         |
| MR                                          | 6.92           | 381.42         |
| Polar                                       | 3.97           | 182.39         |
| Atom Count                                  | 3.00           | 122.00         |
| Atoms in Ring System                        | 0.00           | 66.00          |
| Bond Count                                  | 2.00           | 132.00         |
| Bonds in Ring System                        | 0.00           | 66.00          |
| Centralization                              | 0.00           | 77312.00       |
| Cyclomatic number                           | 0.00           | 11.00          |
| Eccentric connectivity                      | 6.00           | 5688.00        |
| Eccentricity                                | 5.00           | 2668.00        |
| First Zagreb                                | 6.00           | 658.00         |
| Gutman Molecular Topological                | 6.00           | 435922.00      |
| Number of ring systems                      | 0.00           | 11.00          |
| Polarity                                    | 0.00           | 228.00         |
| Quadratic                                   | 0.00           | 88.00          |
| Ramification                                | 0.00           | 55.00          |
| Ring Count 10                               | 0.00           | 1.00           |
| Ring Count 12                               | 0.00           | 1.00           |
| Ring Count 14                               | 0.00           | 1.00           |
| Ring Count 3                                | 0.00           | 3.00           |
| Ring Count 4                                | 0.00           | 2.00           |
| Ring Count 5                                | 0.00           | 4.00           |
| Ring Count 6                                | 0.00           | 11.00          |
| Ring Count 7                                | 0.00           | 1.00           |
| Ring Count 8                                | 0.00           | 1.00           |
| Ring bridge count                           | 0.00           | 24.00          |
| Ring perimeter                              | 0.00           | 66.00          |
| Schultz Molecular Topological               | 16.00          | 412910.00      |
| Second Zagreb                               | 4.00           | 787.00         |
| Sum of topological distances between Br..Br | 0.00           | 117.00         |
| Sum of topological distances between Cl..Br | 0.00           | 20.00          |
| Sum of topological distances between Cl..Cl | 0.00           | 262.00         |

|                                            |        |          |
|--------------------------------------------|--------|----------|
| Sum of topological distances between F..Br | 0.00   | 12.00    |
| Sum of topological distances between F..Cl | 0.00   | 150.00   |
| Sum of topological distances between F..F  | 0.00   | 1170.00  |
| Sum of topological distances between F..I  | 0.00   | 87.00    |
| Sum of topological distances between I..I  | 0.00   | 36.00    |
| Sum of topological distances between N..Br | 0.00   | 42.00    |
| Sum of topological distances between N..Cl | 0.00   | 258.00   |
| Sum of topological distances between N..F  | 0.00   | 268.00   |
| Sum of topological distances between N..I  | 0.00   | 41.00    |
| Sum of topological distances between N..N  | 0.00   | 351.00   |
| Sum of topological distances between N..O  | 0.00   | 505.00   |
| Sum of topological distances between N..P  | 0.00   | 13.00    |
| Sum of topological distances between N..S  | 0.00   | 85.00    |
| Sum of topological distances between O..Br | 0.00   | 124.00   |
| Sum of topological distances between O..Cl | 0.00   | 140.00   |
| Sum of topological distances between O..F  | 0.00   | 342.00   |
| Sum of topological distances between O..I  | 0.00   | 104.00   |
| Sum of topological distances between O..O  | 0.00   | 15037.00 |
| Sum of topological distances between O..P  | 0.00   | 80.00    |
| Sum of topological distances between O..S  | 0.00   | 337.00   |
| Sum of topological distances between P..Br | 0.00   | 27.00    |
| Sum of topological distances between P..Cl | 0.00   | 24.00    |
| Sum of topological distances between P..F  | 0.00   | 9.00     |
| Sum of topological distances between P..P  | 0.00   | 12.00    |
| Sum of topological distances between S..Br | 0.00   | 24.00    |
| Sum of topological distances between S..Cl | 0.00   | 34.00    |
| Sum of topological distances between S..F  | 0.00   | 97.00    |
| Sum of topological distances between S..I  | 0.00   | 4.00     |
| Sum of topological distances between S..P  | 0.00   | 40.00    |
| Sum of topological distances between S..S  | 0.00   | 46.00    |
| Topological diameter                       | 2.00   | 28.00    |
| Topological radius                         | 1.00   | 20.00    |
| Unipolarity                                | 2.00   | 963.00   |
| Variation                                  | 0.00   | 1288.00  |
| Wiener                                     | 4.00   | 97399.00 |
| ALOGP1                                     | -2.10  | 328.90   |
| ALOGP10                                    | -1.21  | 844.18   |
| ALOGP2                                     | -22.35 | 414.63   |
| ALOGP3                                     | 0.00   | 760.39   |
| ALOGP4                                     | -3.84  | 87.52    |
| ALOGP5                                     | -4.32  | 177.07   |
| ALOGP6                                     | 0.00   | 161.96   |
| ALOGP7                                     | 0.00   | 315.19   |
| ALOGP8                                     | 0.00   | 177.83   |
| ALOGP9                                     | 0.00   | 67.88    |
| Average connectivity index chi-0           | 0.66   | 0.90     |

|                                                                    |         |            |
|--------------------------------------------------------------------|---------|------------|
| Average connectivity index chi-1                                   | 0.37    | 0.71       |
| Average eccentricity                                               | 1.67    | 21.87      |
| Average valence connectivity index chi-0                           | 0.42    | 1.34       |
| Average valence connectivity index chi-1                           | 0.21    | 1.31       |
| Average vertex distance degree                                     | 2.67    | 1596.70    |
| Balaban-type index from Z weighted distance matrix - Barysz matrix | 0.94    | 11.59      |
| Balaban-type index from mass weighted distance matrix              | 0.94    | 11.61      |
| Balaban distance connectivity index                                | 0.83    | 7.08       |
| Connectivity chi-1 [Randic connectivity]                           | 1.41    | 57.35      |
| Connectivity index chi-0                                           | 2.71    | 89.38      |
| E-state topological parameter                                      | 0.16    | 776.74     |
| Eccentric                                                          | 0.00    | 3.36       |
| First Mohar                                                        | -122.29 | 5679.05    |
| First Zagreb index by valence vertex degrees                       | 8.13    | 2410.00    |
| Global topological charge                                          | 0.00    | 1.00       |
| Gutman MTI by valence vertex degrees                               | 7.31    | 1837350.00 |
| Harary                                                             | 2.50    | 900.32     |
| Hyper-distance-path index                                          | 5.00    | 827956.00  |
| Kier Hall electronegativity                                        | -0.38   | 66.00      |
| Kier benzene-likeness index                                        | 0.63    | 3.94       |
| Log of product of row sums                                         | 1.26    | 389.55     |
| MR1                                                                | -7.99   | 93.01      |
| MR8                                                                | 41.07   | 1493.91    |
| Mean Distance Degree Deviation                                     | 0.00    | 285.90     |
| Mean Square Distance Balaban                                       | 1.41    | 14.53      |
| Mean Wiener                                                        | 1.33    | 13.20      |
| Mean topological charge index of order 1                           | 0.00    | 0.75       |
| Mean topological charge index of order 10                          | 0.00    | 0.02       |
| Mean topological charge index of order 2                           | 0.00    | 0.22       |
| Mean topological charge index of order 3                           | 0.00    | 0.19       |
| Mean topological charge index of order 4                           | 0.00    | 0.15       |
| Mean topological charge index of order 5                           | 0.00    | 0.12       |
| Mean topological charge index of order 6                           | 0.00    | 0.06       |
| Mean topological charge index of order 7                           | 0.00    | 0.04       |
| Mean topological charge index of order 8                           | 0.00    | 0.04       |
| Mean topological charge index of order 9                           | 0.00    | 0.03       |
| Modified Randic connectivity                                       | 9.19    | 373.39     |
| Molecular electrotopological variation                             | 0.00    | 411.11     |
| Molecule cyclized degree                                           | 0.00    | 1.00       |
| Narumi Geometric Topological                                       | 1.26    | 2.35       |
| Narumi Harmonic Topological                                        | 1.18    | 2.31       |
| Narumi Simple Topological                                          | 0.69    | 82.60      |
| Petitjean 2D shape                                                 | 0.00    | 1.00       |
| Pogliani                                                           | 6.50    | 290.00     |
| Quasi Wiener                                                       | 4.00    | 82992.83   |

|                                                                   |       |           |
|-------------------------------------------------------------------|-------|-----------|
| Radial centric                                                    | 0.00  | 3.82      |
| Reciprocal hyper-distance-path index                              | 2.33  | 353.23    |
| Schultz Molecular Topological by valence vertex degrees           | 27.25 | 848506.00 |
| Second Mohar                                                      | 0.40  | 10.97     |
| Second Zagreb index by valence vertex degrees                     | 5.04  | 2222.00   |
| Solvation connectivity index chi-0                                | 2.71  | 89.38     |
| Solvation connectivity index chi-1                                | 1.41  | 57.35     |
| Spanning tree number                                              | 0.00  | 19.71     |
| Square reciprocal distance sum                                    | 2.25  | 273.75    |
| Topological charge index of order 1                               | 0.00  | 33.00     |
| Topological charge index of order 10                              | 0.00  | 2.57      |
| Topological charge index of order 2                               | 0.00  | 20.22     |
| Topological charge index of order 3                               | 0.00  | 14.14     |
| Topological charge index of order 4                               | 0.00  | 11.88     |
| Topological charge index of order 5                               | 0.00  | 6.19      |
| Topological charge index of order 6                               | 0.00  | 5.36      |
| Topological charge index of order 7                               | 0.00  | 4.06      |
| Topological charge index of order 8                               | 0.00  | 3.41      |
| Topological charge index of order 9                               | 0.00  | 3.22      |
| Total structure connectivity                                      | 0.00  | 0.71      |
| Valence connectivity index chi-0                                  | 1.52  | 59.89     |
| Valence connectivity index chi-1                                  | 0.51  | 33.18     |
| Van der Waals surface area                                        | 61.59 | 1493.91   |
| Wiener-type index from Z weighted distance matrix - Barysz matrix | 1.71  | 76755.33  |
| Wiener-type index from mass weighted distance matrix              | 1.70  | 76784.78  |
| Xu                                                                | 1.65  | 81.71     |
| Reciprocal distance Randic-type index                             | 1.15  | 8.84      |
| Reciprocal distance square Randic-type index                      | 3.46  | 2020.05   |

**Table S4.** Synoptic view of confusion matrix.

|                 |   | EXPERIMENTAL CLASS |                |
|-----------------|---|--------------------|----------------|
|                 |   | P                  | N              |
| PREDICTED CLASS | P | True Positive      | False Positive |
|                 | N | False Negative     | True Negative  |



**Table S5.** Number (percentage) of excluded compounds undocked or returning unrealistic (positive) values of docking score for all the considered crystal structures (PDB entries: 2AM9, 2AX9, 2PNU, 3B66, 3L3X, 3RLJ, 5CJ6, 4QL8 and 2HVC).

| <b>PDB CODE</b> | <b>Total EPA-ARDB</b> | <b>Excluded compounds (%)</b> |
|-----------------|-----------------------|-------------------------------|
| <b>2AM9</b>     | 1592                  | 97 (6.09%)                    |
| <b>2AX9</b>     | 1599                  | 90 (5.62%)                    |
| <b>2PNU</b>     | 1643                  | 46 (2.79%)                    |
| <b>3B66</b>     | 1636                  | 53 (3.23%)                    |
| <b>3L3X</b>     | 1595                  | 94 (5.89%)                    |
| <b>3RLJ</b>     | 1635                  | 54 (3.30%)                    |
| <b>5CJ6</b>     | 1607                  | 82 (5.10%)                    |
| <b>4QL8</b>     | 1612                  | 77 (4.77%)                    |
| <b>2HVC</b>     | 1622                  | 67 (4.13%)                    |

**Table S6.** Number (percentage) of excluded compounds after the application of the first filter (VS – Bounding box) and after the application of both filters (VS – Bounding box/Convex hull) for all the three docked VS.

|            | <b>VS – Bounding box (%)</b> | <b>VS – Bounding box/Convex hull (%)</b> |
|------------|------------------------------|------------------------------------------|
| <b>VS1</b> | 102 (3.93%)                  | 355 (13.70%)                             |
| <b>VS2</b> | 115 (4.44%)                  | 374 (14.44%)                             |
| <b>VS3</b> | 104 (4.01%)                  | 361 (13.93%)                             |

**Table S7.** Percentage of binders found at SE >0.75 in the class of predicted non-binders for all the considered methods on the three VS (DES: Molecular descriptors; ECFP: Extended Connectivity Fingerprint; FCFP: Functional Connectivity Fingerprint; DAY: Daylight Fingerprint; PCA: Principal component analysis; t-SNE: t-Distributed Stochastic Neighbour Embedding).

|                                               | <b>VS1</b> | <b>VS2</b> | <b>VS3</b> |
|-----------------------------------------------|------------|------------|------------|
| <b>Bounding box/Convex hull DES (PCA)</b>     | 4.42%      | 4.59%      | 5.09%      |
| <b>Bounding box/Convex hull ECFP (PCA)</b>    | 6.61%      | 6.98%      | 7.53%      |
| <b>Bounding box/Convex hull FCFP (PCA)</b>    | 7.60%      | 7.96%      | 8.85%      |
| <b>Bounding box/Density ECFP (PCA)</b>        | 4.57%      | 5.50%      | 5.92%      |
| <b>Bounding box/Density FCFP (PCA)</b>        | 8.16%      | 8.03%      | 9.26%      |
| <b>Bounding box/Convex hull ECFP (t-SNE*)</b> | 7.17%      | 7.65%      | 8.19%      |
| <b>Bounding box/Convex hull FCFP (t-SNE*)</b> | 7.15%      | 7.52%      | 8.10%      |

\* t-SNE was employed over a set of 2048 bit Morgan circular fingerprints (equivalent to ECFP or FCFP computed using the RDkit module in Python<sup>1</sup>), with a radius of 2.

**Table S8.** Docking score relative to twelve representative substances predicted by the 2PNU best performing classification model.

| Referend compound | Chemical structure                                                                   | Docking score (kJ/mol) |
|-------------------|--------------------------------------------------------------------------------------|------------------------|
| R1881             | 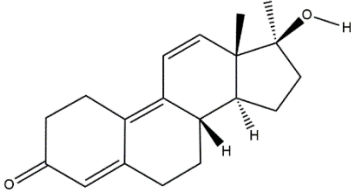   | -41.99                 |
| Nandrolone        |   | -39.43                 |
| p,p'-DDE          |  | -34.40                 |
| Bisphenol-A       |  | -33.09                 |
| PBDE-99           |  | -31.99                 |
| Ketoprofen        |  | -30.08                 |

|                      |                                                                                      |               |
|----------------------|--------------------------------------------------------------------------------------|---------------|
| <b>Diclofenac</b>    | 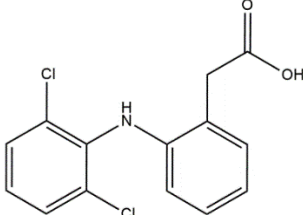    | <b>-29.77</b> |
| <b>Naproxen</b>      |    | <b>-27.57</b> |
| <b>Ibuprofen</b>     |    | <b>-26.44</b> |
| <b>Butylparaben</b>  |   | <b>-25.13</b> |
| <b>Propylparaben</b> |  | <b>-22.17</b> |
| <b>Methylparaben</b> |  | <b>-19.73</b> |

## Figures

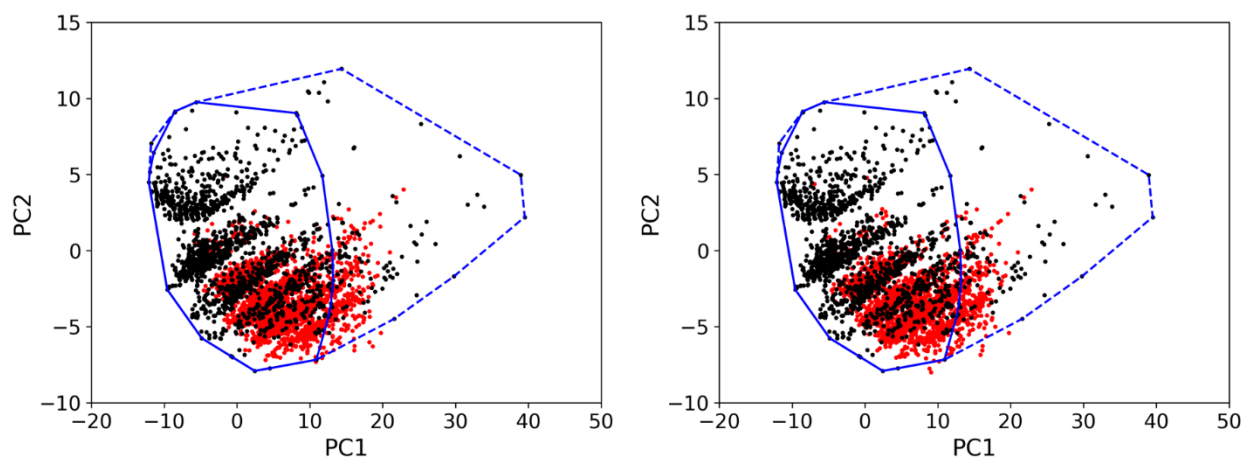

**Figure S1.** The convex-hull was defined on the top two PCs obtained from the 162 descriptors computed for each compound of the EPA-ARDB. The outer polygon (dashed line) takes into accounts all the chemicals in the EPA-ARDB (black circles), while the inner polygon (solid line) retains the 95% of them based on a user-dependent inclusive threshold. Chemicals (red circles) of the VS2 (on the left side) and VS3 (on the right side) outside the inner 95% polygon are flagged as outside AD.

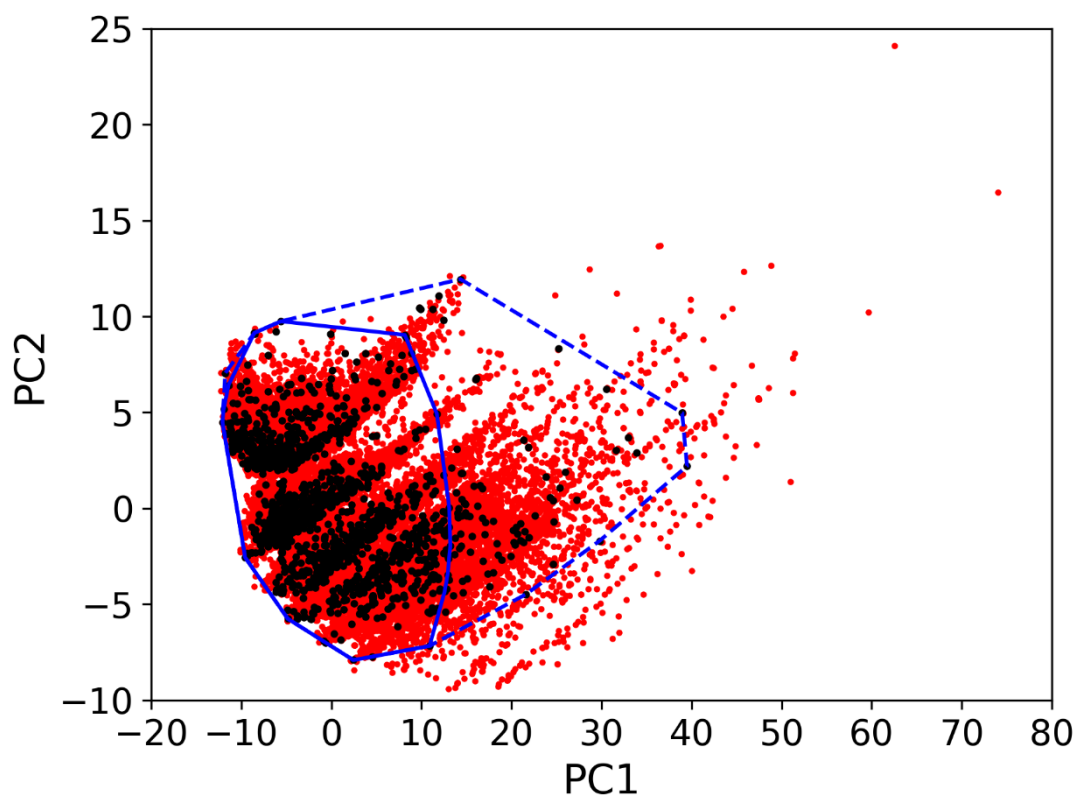

**Figure S2.** The convex-hull was defined on the top two PCs obtained from the 162 descriptors computed for each compound of the EPA-ARDB. The outer polygon (dashed line) takes into accounts all the chemicals in the EPA- ARDB (black circles), while the inner polygon (solid line) retains the 95% of them based on a user-dependent inclusive threshold. Chemicals of the external blind dataset (red circles) outside the inner 95% polygon are flagged as outside AD.

## Supplementary methodological details

The definition of AD is given by the subsequent application of two-step approach: the former is the bounding box method; the latter is applied by means of an interpolation space based on:

- the Cartesian coordinates of the top two principal components (PCs) obtained from the initial 162 descriptors (see Bounding box/Convex hull DES (PCA) in Table S7);
- the Cartesian coordinates of the top two PCs obtained from the Extended-connectivity fingerprints (ECFPs) (see Bounding box/Convex hull ECFP (PCA) in Table S7);
- the Cartesian coordinates of the top two PCs obtained from the Functional-connectivity fingerprints (FCFPs) (see Bounding box/Convex hull FCFP (PCA) in Table S7);
- the probability density distribution of the Cartesian coordinates of the top two PCs obtained from the ECFPs following the Jouan-Rimbaud et al. protocol<sup>2</sup> (see Bounding box/Density ECFP (PCA) in Table S7);
- the probability density distribution of the Cartesian coordinates of the top two PCs obtained from the FCFPs following the Jouan-Rimbaud et al. protocol<sup>2</sup> (see Bounding box/Density FCFP (PCA) in Table S7);
- ECFPs calculated for each compound of EPA-ARDB. The chemicals were projected into a 2D map using t-SNE technique.<sup>3</sup> This map was employed to define a convex hull filter (see Bounding box/Convex hull ECFP (t-SNE) in Table S7);
- FCFPs calculated for each compound of EPA-ARDB. The chemicals were projected also into a 2D map using t-SNE technique.<sup>3</sup> This map was employed to define a convex hull filter (see Bounding box/Convex hull FCFP (t-SNE) in Table S7).

## REFERENCES

- (S1) RDKit: Open-Source Cheminformatics; [Http://Www.rdkit.org](http://www.rdkit.org) ; Last Accessed 12/09/2017.
- (S2) Jouan-Rimbaud, D.; Bouveresse, E.; Massart, D. L.; de Noord, O. E. Detection of Prediction Outliers and Inliers in Multivariate Calibration. *Anal. Chim. Acta* **1999**, *388*, 283–301.
- (S3) Maaten, L. van der; Hinton, G. Visualizing Data Using T-SNE. *J. Mach. Learn. Res.* **2008**, *9*, 2579–2605.
